# Supplementary material for: Characterization of Microbial Communities in Pilot-Scale Constructed Wetlands with Salicornia for Treatment of Marine Aquaculture Effluents
Source: Hindawi journal article supplement (doi:10.1155/2018/7819840), 2018-01-01
Supplement: f1 [file 7819840.f1.pdf]

TABLE S1: Relative abundances of the major phylum in the root and substrate samples of the CWs treating mariculture wastewater of different TAN concentrations.

|                 |   | L                    |        | M                    |        | H                   |        |
|-----------------|---|----------------------|--------|----------------------|--------|---------------------|--------|
|                 |   | Mean                 | SD     | Mean                 | SD     | Mean                | SD     |
| Proteobacteria  | R | 0.6690*              | 0.0832 | 0.7252*              | 0.0657 | 0.6369*             | 0.1080 |
|                 | S | 0.3639**             | 0.1250 | 0.3763**             | 0.0204 | 0.3644**            | 0.1138 |
| Firmicutes      | R | 0.1135               | 0.0481 | 0.1076               | 0.0642 | 0.0414              | 0.0244 |
|                 | S | 0.0906               | 0.0666 | 0.0765               | 0.0168 | 0.1049              | 0.1360 |
| Cyanobacteria   | R | 0.0948*              | 0.0199 | 0.0746*              | 0.0341 | 0.1162*             | 0.0249 |
|                 | S | 0.3898**             | 0.0947 | 0.4098**             | 0.0612 | 0.3565**            | 0.0378 |
| Bacteroidetes   | R | 0.0545 <sup>ab</sup> | 0.0183 | 0.0315 <sup>a</sup>  | 0.0119 | 0.1215 <sup>b</sup> | 0.0575 |
|                 | S | 0.0248 <sup>a</sup>  | 0.0108 | 0.0282 <sup>a</sup>  | 0.0067 | 0.0939 <sup>b</sup> | 0.0344 |
| Planctomycetes  | R | 0.0212               | 0.0127 | 0.0175               | 0.0066 | 0.0194              | 0.0108 |
|                 | S | 0.0213               | 0.0076 | 0.0221               | 0.0089 | 0.0206              | 0.0132 |
| Crenarchaeota   | R | 0.0146 <sup>a</sup>  | 0.0020 | 0.0137 <sup>a</sup>  | 0.0222 | 0.0003 <sup>b</sup> | 0.0003 |
|                 | S | 0.0064               | 0.0069 | 0.0021               | 0.0030 | 0.0001              | 0.0001 |
| Acidobacteria   | R | 0.0072               | 0.0075 | 0.0056               | 0.0029 | 0.0033              | 0.0024 |
|                 | S | 0.0066               | 0.0033 | 0.0078               | 0.0095 | 0.0022              | 0.0016 |
| Actinobacteria  | R | 0.0056               | 0.0040 | 0.0028*              | 0.0006 | 0.0019              | 0.0010 |
|                 | S | 0.0069               | 0.0038 | 0.0055**             | 0.0008 | 0.0036              | 0.0012 |
| Verrucomicrobia | R | 0.0045 <sup>*a</sup> | 0.0014 | 0.0030 <sup>*a</sup> | 0.0004 | 0.0088 <sup>b</sup> | 0.0020 |
|                 | S | 0.0776**             | 0.0401 | 0.0528**             | 0.0168 | 0.0249              | 0.0184 |
| Chloroflexi     | R | 0.0044               | 0.0030 | 0.0079               | 0.0025 | 0.0120              | 0.0130 |
|                 | S | 0.0023               | 0.0026 | 0.0047               | 0.0009 | 0.0051              | 0.0041 |
| WS3             | R | 0.0004 <sup>a</sup>  | 0.0002 | 0.0003 <sup>a</sup>  | 0.0002 | 0.0084 <sup>b</sup> | 0.0059 |
|                 | S | 0.0005               | 0.0003 | 0.0002               | 0.0001 | 0.0071              | 0.0072 |
| Chlorobi        | R | 0.0002 <sup>a</sup>  | 0.0001 | 0.0014 <sup>a</sup>  | 0.0008 | 0.0111 <sup>b</sup> | 0.0075 |
|                 | S | 0.0001 <sup>a</sup>  | 0.0001 | 0.0005 <sup>a</sup>  | 0.0002 | 0.0039 <sup>b</sup> | 0.0017 |
| others          | R | 0.0010               | 0.0055 | 0.0088               | 0.0026 | 0.0187              | 0.0140 |
|                 | S | 0.0093               | 0.0057 | 0.0134               | 0.0086 | 0.0125              | 0.0085 |

R: Root samples; S: Substrate samples. Difference among groups of L, M, H groups were tested with one-way ANOVA and different characters indicate significant differences ( $p < 0.05$ ). Difference between R and S samples in each group were tested with Student's t test and '\*', '\*\*' indicate significant differences ( $p < 0.05$ ). (means  $\pm$  SD, n = 3)

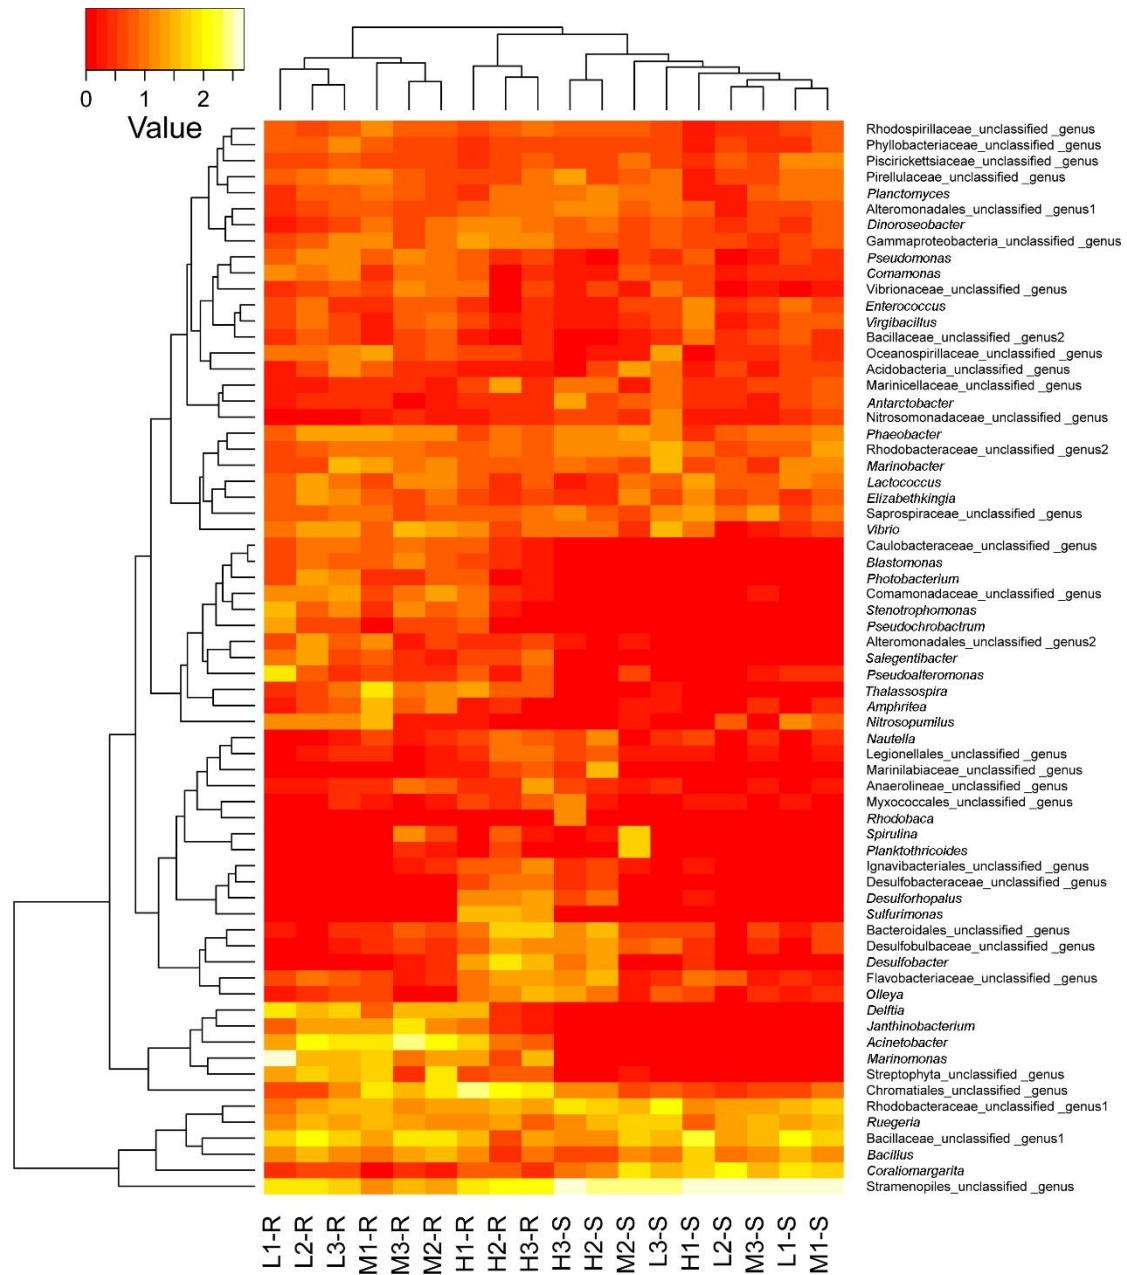

**FIGURE S1:** Heatmap of microbial genera of root and substrate samples treating mariculture wastewater of different TAN concentration. (dominant genus of relative abundance >1%).
